# Supplementary material
Source: MDPI journal article supplement (https://www.mdpi.com/2071-1050/9/11/1924)
Supplement: s1 [file s1]

## Supplementary material.

S1 Table Areas, facilities and vegetation configuration of green spaces in selected district parks

| District         |                           | District Park                           | Area<br>(ha) | Facilities*                                                                               | F <sub>s</sub> | Vegetation Cover |      |      |      |      |      | ID |
|------------------|---------------------------|-----------------------------------------|--------------|-------------------------------------------------------------------------------------------|----------------|------------------|------|------|------|------|------|----|
|                  |                           |                                         |              |                                                                                           |                | P1               | P2   | P3   | P4   | P5   | VC   |    |
| Hong Kong Island | Central & Western         | Hong Kong Park                          | 8            | 2 indoor facilities, 2 gardens, 2 conservation area, 2 gardens, 1 playground and 6 others | 15             | 0.98             | 0.01 | 0    | 0.01 |      | 0.99 |    |
|                  |                           | Hong Kong Zoological and Botanical Park | 5.6          | 4 animal enclosures, 9 plant gardens, 1 playground and 7 others                           | 21             | 0.97             | 0    |      | 0.03 |      | 0.98 |    |
|                  |                           | Belcher Bay Park                        | 1.85         | 1 garden and 2 others                                                                     | 3              | 0.92             | 0    |      | 0.07 |      | 0.94 |    |
|                  | Wan Chai Southern Eastern | Happy valley                            | 19.46        | 6 court, 1 track, 1 recreation ground and 3 others                                        | 11             | 0.57             | 0.07 | 0.01 | 0.35 |      | 0.67 | 1  |
|                  |                           | Waterfall Bay Park                      | 3.15         | 1 garden, 1 promenade and 1 other                                                         | 4              | 0.99             | 0    |      |      | 0.01 | 0.99 | 2  |
|                  |                           | Quarry Bay Park                         | 9.79         | 2 courts, 1 playground, 1 trail, 1 garden, 1 track, 1 promenade, 3 others                 | 11             | 0.44             | 0.39 |      | 0.16 | 0.02 | 0.63 | 3  |
|                  |                           | Chai Wan Park                           | 6.55         | 3 courts, 1 playground, 1 amphitheatre, 2 gardens and 3 others                            | 10             | 0.96             | 0.02 | 0    |      | 0.02 | 0.96 | 4  |
|                  |                           | Victoria Park                           | 17           | 28 courts, 2 trail, 5 playgrounds, 5 others                                               | 41             | 0.86             | 0.07 | 0.03 | 0.03 | 0    | 0.91 | 5  |
| Kowloon          | Kowloon City              | Choi Sai Woo Park                       | 4.41         | 1 garden and 2 others                                                                     | 3              | 0.88             | 0.01 | 0    | 0.02 | 0.09 | 0.88 | 6  |
|                  |                           | Kowloon Walled City Park                | 10.73        | 9 courts, 2 playgrounds, 1 track, 1 trail and 8 others                                    | 20             | 0.83             | 0.05 | 0.01 | 0.12 |      | 0.87 | 7  |
|                  |                           | Kowloon Tsai Park                       | 14.57        | 8 courts, 1 swimming pool, 1 indoor facility and 2 others                                 | 12             | 0.79             | 0.03 | 0    | 0.18 |      | 0.84 | 8  |
|                  |                           | Junction Road Park                      | 2.25         | 2 court, 1 garden, 1 playground and 1 other                                               | 5              | 0.99             | 0    | 0    |      |      | 0.99 | 9  |
|                  |                           | Ko Shan Road Park                       | 2.19         | 1 court, 1 playground, 1 theatre, 1 garden and 1 other                                    | 5              | 0.97             | 0.03 |      |      |      | 0.98 | 10 |

|                     |               |                         |       |                                                                                                                                    |    |      |      |      |       |      |      |    |
|---------------------|---------------|-------------------------|-------|------------------------------------------------------------------------------------------------------------------------------------|----|------|------|------|-------|------|------|----|
| The New Territories | Yau Tsim Mong | Hutchison Park          | 2.88  | 1 garden and 2 others                                                                                                              | 3  | 0.94 | 0.06 | 0    |       |      | 0.97 | 11 |
|                     |               | Lok Fu Park             | 5.36  | 1 court and 2 others                                                                                                               | 3  | 1    | 0    |      |       |      | 1    | 12 |
|                     |               | Kowloon Park            | 13.47 | 1 court, 1 trail, 2 playgrounds, 5 gardens, 1 conservation corner, 2 animal regions, 1 swimming pool and 1 sports center, 4 others | 18 | 0.82 | 0.06 | 0.05 | 0.08  | 0.01 | 0.87 | 13 |
|                     | Sham Shui Po  | Lai Chi Kok Park        | 17.65 | 12 courts, 5 playgrounds, 1 amphitheatre, 5 trails, 2 chess places, 3 gardens                                                      | 28 | 0.49 | 0.30 | 0    | 0.17  | 0.04 | 0.64 | 14 |
|                     |               | Fa Hui Park             | 3.24  | 1 court, 1 garden, 1 playground and 1 other                                                                                        | 4  | 1    |      |      |       |      | 1    | 15 |
|                     |               | Sham Shui Po Park       | 1.97  | 1 garden and 2 others                                                                                                              | 3  | 1    |      |      |       |      | 1    | 16 |
|                     |               | Shek Kip Mei Park       | 8     | 4 indoor activating rooms, 5 courts, 1 square, 1 garden, 1 playground, 1 trail and 7 others                                        | 20 | 0.98 | 0.01 |      | 0.013 |      | 0.99 | 17 |
|                     | Wong Tai Sin  | Tung Chau Street Park   | 3     | 2 court, 1 garden, 1 indoor facility and 2 others                                                                                  | 6  | 0.96 | 0.04 |      |       |      | 0.98 | 18 |
|                     |               | Morse Park              | 11.45 | 3 courts, 1 playground, 1 indoor facility, 1 theatre, 4 gardens and 2 others                                                       | 12 | 0.69 | 0.2  |      | 0.08  | 0.03 | 0.78 | 19 |
|                     |               | Fung Tak Park           | 1.06  | 1 garden and 2 others                                                                                                              | 3  | 0.44 | 0.45 |      | 0.11  |      | 0.64 | 20 |
|                     | Kwun Tong     | Lam Tin Park            | 6.29  | 1 court and 2 others                                                                                                               | 3  | 0.68 | 0.29 |      | 0.03  | 0    | 0.80 | 21 |
|                     | Kwai Chung    | Central Kwai Chung Park | 10.56 | 5 courts, 1 picnic area, 2 playgrounds, 1 trail, 1 conservation corner and 2 others                                                | 12 | 0.98 | 0.01 |      |       | 0.01 | 0.98 | 22 |
|                     | Tsing Yi      | Tsing Yi Park           | 6.94  | 2 courts, 1 playground, 2 trails, 1 picnic area, 1 amphitheatre and 4 others                                                       | 11 | 0.76 | 0.19 | 0.01 | 0.04  | 0    | 0.85 | 23 |
|                     | Tai Po        | Tai Po Waterfall Park   | 22    | 2 courts, 2 gardens, 1 amphitheatre, 1 promenade, 1 playground, 1 insect house, 2 others                                           | 11 | 0.76 | 0.01 | 0.01 | 0.22  |      | 0.81 | 24 |
|                     | Tseung Kwan O | Po On Park              | 4.13  | 4 courts, 1 trail and 1 playground                                                                                                 | 6  | 0.94 | 0.05 |      | 0.01  |      | 0.96 | 25 |
|                     |               | Po Tsui Park            | 4.24  | 11 courts, 1 trail and 1 playground.                                                                                               | 13 | 0.74 | 0.03 |      |       | 0.24 | 0.72 | 26 |

\*Source:

1. Leisure and Cultural Services Department. Parks. [http://www.lcsd.gov.hk/en/ls\\_park.php](http://www.lcsd.gov.hk/en/ls_park.php), accessed on October 27, 2006
2. Survey and Mapping Office, Lands Department, HKSAR, 2004. Hong Kong Guide 2004 (photomap edition). Government Logistics Department.
